# Supplementary material for: A novel methodology for the synthesis of complexes containing long carbon chains linking metal centres: molecular structures of {Ru(dppe)Cp*}2(μ-C14) and {Co3(μ-dppm)(CO)7}2(μ3:μ3-C16)
Source: Royal Society of Chemistry journal article supplement (doi:10.1039/b315854n), 2004-01-01
Supplement: b315854n.doc [file b315854n.doc]

**Paper B315584N (revised)**

**A novel methodology for the synthesis of complexes containing long carbon chains linking metal centres: molecular structures of {Ru(dppe)Cp*}2(-C14) and {Co3(-dppm)(CO)7}2(3:3-C16)**

Alla B. Antonova,*a,b* Michael I. Bruce,*a* Benjamin G. Ellis,*a* Maryka Gaudio,*a* Paul A. Humphrey,*a* Martyn Jevric,*a* Giovanni Melino,*a* Brian K. Nicholson,*c* Gary J. Perkins,*a* Brian W. Skelton,*d* Bronwin Stapleton,*a* Allan H. White,*d* Natasha N. Zaitseva*a*

**SUPPLEMENTARY MATERIAL**

**Syntheses of FcCCCCAu(PPh3), 4, 6-9.**

**FcCCCCAu(PPh3).** Powdered KOH (100 mg, 1.8 mmol) in dry MeOH (15 ml) was added to FcCCCCSiMe3 (72 mg, 0.235 mmol) and AuCl(PPh3) (105 mg, 0.212 mmol). After stirring for 1 h at r.t., cooling the solution in ice gave an orange precipitate of FcCCCCAu(PPh3) (120 mg, 85%), which was collected, washed with cold MeOH and dried. Anal. Calcd (C32H24AuP): C, 55.52; H, 3.49; *M*, 692. Found: C, 55.53; H, 3.40. IR (nujol): (CC) 2191w, 2053w cm-1. 1H NMR (C6D6):  3.83, 4.34 (2 x s, 2 x 2H, C5H4), 4.01 (s, FeCp), 6.88-6.98 (m, 8H, Ph), 7.10-7.16 (m, 7H, Ph). 13C NMR (C6D6):  66.61, 69.19 (C5H4), 70.36, 70.65 (FeCp), 72.85 (C5H4), 74.82, 88.27, 128.19, 128.67, 129.46, 129.68, 130.01, 131.11, 131.68, 131.73, 134.64, 134.92. 31P NMR (C6D6):  41.36. ES-MS (positive ion, *m/z*): 692, M+.

**Os3(-H)3(3-CCCCCFc)(CO)9 (4).** Os3(-H)3(3-CBr)(CO)9 (51 mg, 0.056 mmol), Au(CCCCFc)(PPh3) (40 mg, 0.058 mmol), Pd(PPh3)4 (4 mg, 0.003 mmol) and CuI (1 mg, 0.005 mmol) in thf (10 ml) at r.t. for 1 h afforded red-orange Os3(-H)3(3-CCCCCFc)(CO)9 (**4**) (48 mg, 80%). Anal. Calcd (C24H12FeO9Os3): C, 26.92; H, 1.13; M, 1072. Found: C, 26.95; H, 1.12. IR (cyclohexane): (CC) 2108w; (CO) 20686vs, 2079 (sh), 2028 (sh), 2023vs, 2013w, 1982w (br) cm-1. 1H NMR (CDCl3):  -19.03 (s, 3H, OsH), 4.22, 4.49 (2 x m, 2 x 2H, C5H4), 4.28 (s, 5H, FeCp). ES-MS (negative ion, MeOH + NaOMe, *m/z*): 1103, [M + OMe]-; 1071, [M - H]-; 1043-959, [M - H - nCO]- (n = 1-4).

**Co3{3-CCCCC[Ru(dppe)Cp*]}(-dppm)(CO)7 (6).** Dark red crystals of Co3{3-CCCCC[Ru(dppe)Cp*]}(-dppm)(CO)7 (**6**) (52.7 mg, 70%) were obtained from the reaction between Ru{CCCCAu[P(tol)3]}(PPh3)2Cp (50 mg, 0.05 mmol), Co3(3-CBr)(-dppm)(CO)7 (45 mg, 0.05 mmol), Pd(PPh3)4 (4 mg) and CuI (1 mg) in thf (& ml) for 1 h at r.t. Anal. Calcd (C73H61Co3O7P3Ru): C, 60.38; H, 4.23; *M*, 1452. Found: C, 60.25; H, 4.17. IR (cyclohexane): (CC) 2107vw; (CO) 2062w, 2044m, 2009s, 2003vs, 1989 (sh), 1976vw, 1968vw, 1952vw cm-1. 1H NMR (CDCl3):  1.59 (s, 15H, Cp*), 2.03, 2.69 (2 x m, 2 x 2H, dppe), 3.21, 4.52 (2 x m, 2 x 1H, dppm), 7.03-7.70 (m, 40H, Ph). 13C NMR (CDCl3): 10.13 (s, C5*Me5*), 29.69 [s (br), dppe], 38.38 (s, dppm), 86.08, 96.09, 109.60, 137.61 (carbon chain), 93.64 (s, *C5*Me5), 127.42-133.38 (m, Ph), 202.83, 203.35, 210.32 (CO). 31P NMR (CDCl3):  33.50 (s, dppm), 79.45 (s, dppe). ES-MS (positive ion, MeOH, *m/z*): 1452, M+; 1424, [M - CO]+; 1396, [M - 2CO]+; (negative ion, MeOH + NaOMe, *m/z*): 1452, M-.

**Fe{-C5H4CC-3-C[Co3(-dppm)(CO)7]}2 (7).** The reaction between Fe{-C5H4CCAu[P(tol)3]}2 (26 mg, 0.02 mmol), Co3(3-CBr)(-dppm)(CO)7 (36 mg, 0.04 mmol), in the presence of Pd(PPh3)4 (1 mg) and CuI (1 mg) was carried out in thf (5 ml) for 2 h at r.t. Preparative t.l.c. (hexane-acetone 7/3) developed a red-brown fraction (*R*f 0.34) which contained Fe{-C5H4CC-3-C[Co3(-dppm)(CO)7]}2 (**7**) as dark red crystals (35.7 mg, 96%). Anal. Calcd (C80H52Co6FeO14P4): C, 54.23; H, 2.94; *M*, 1770. Found: C, 54.26; H, 2.96. IR (CH2Cl2): (CC) 2122vw; (CO) 2057s, 2008vs, 1989 (sh), 1977 (sh), 1964 (sh) cm-1. 1H NMR (CDCl3):  3.43, 4.44 (2 x m, 2 x 2H, CH2), 4.40, 4.53 (2 x m, 2 x 4H, C5H4), 7.11-7.52 (m, 40H, Ph). 31P NMR (CDCl3):  33.68 [s (br), dppm]. ES-MS (positive ion, MeOH + NaOMe, *m/z*): 1793, [M + Na]+; 1770, M+; (negative ion, MeOH + NaOMe, *m/z*): 1769, [M - H]-.

**{Ru(dppe)Cp*}2{-(CC)7} (8).** Similarly, a mixture of Ru{CCCCAu(PPh3)}(dppe)Cp (200 mg, 0.17 mmol), I(CC)3I (28.5 mg, 0.09 mmol), Pd(PPh3)4 (20 mg, 0.02 mmol) and CuI (2 mg, 0.01 mmol) in benzene / NEt3 (1/1, 30 ml) was stirred for 3 h at r.t. Purification by column chromatography (alumina) gave AuI(PPh3), eluted with Et2O, and {Ru(dppe)Cp*}2{-(CC)7} (**8**) (45 mg, 36%), eluted with benzene / NEt3 (7/3). Anal. Calcd (C86JH78P4Ru2.CH2Cl2): C, 68.63; H, 5.29; *M* (unsolvated), 1437. Found: C, 68.92; H, 5.19. IR (nujol): (CC) 2058m, 1947 (br) cm-1. 1H NMR (C6D6):  1.45 [t, *J*(HP) 2 Hz, 30H, Cp*], 1.70, 2.36 (2 x m, 2 x 4H, CH2), 6.99-7.68 (m, 40H, Ph). 13C NMR (C6D6):  10.39 (s, C5*Me5*), 30.01 (s, CH2), 94.75 (s, *C5*Me5), 129.43-133.95 (m, Ph). 31P (C6D6):  78.96 (s, dppe). ES-MS (positive ion, MeOH, *m/z*): 1438, [M + H]+; 635, [Ru(dppe)Cp*]+.

**{Co3(-dppm)(CO)7}2{3:3-C(CC)7C} (9).** Similarly, a mixture of Co3{3-CCCCC[Au(PPh3)]}(-dppm)(CO)7 (153 mg, 0.12 mmol), I(CC)3I (20 mg, 0.06 mmol), Pd(PPh3)4 (7 mg, 0.006 mmol) and CuI (1 mg, 0.006 mmol) in thf (7 ml) for 1 h afforded dark red-purple {Co3(-dppm)(CO)7}2{3:3-C(CC)7C} (9) (91 mg, 86%). Anal. Calcd (C80H44Co6O14P4): C, 56.27; H, 2.58; *M*, 1706. Found: C, 56.38; H, 2.60. IR (CH2Cl2): (CC) 2172w, 2157vw, 2127vw; (CO) 2065s, 2020vs, 2008 (sh), 1990 (sh), 1986m (br),, 1960 (sh) cm-1. 1H NMR (CDCl3):  3.46, 4.25 (2 x m, 2 x 2H, CH2), 6.97-7.58 (m, 40H, Ph). 13C NMR (CDCl3):  44.51 [s (br), dppm], 64.36, 6.66, 68.28, 70.22, 81.45, 95.98, 99.83 (7 x s, carbon chain), 124.21-136.43 (m, Ph), 201.06 [s (br), CO]. 31P NMR (CDCl3):  33.93 [s (br), dppm]. ES-MS (positive ion, NaOMe + MeOH, *m/z*): 1729, [M + Na][+; (negative ion, MeOH + NaOMe, *m/z*): 1705, [M - H]-, 852, [Co3(dppm)(C8) - H]-.
